# Supplementary material
Source: ML conference proceedings conference paper supplement (https://openaccess.thecvf.com/content/ICCV2021/html/Strohm_Neural_Photofit_Gaze-Based_ICCV_2021_paper.html)
Supplement: Supplementary file 1 [file Strohm_Neural_Photofit_Gaze-Based_ICCV_2021_supplemental.zip]

# Neural Photofit: Gaze-based Mental Image Reconstruction - Supplementary Material

Florian Strohm<sup>1</sup>, Ekta Sood<sup>1</sup>, Sven Mayer<sup>2</sup>, Philipp Müller<sup>3</sup>, Mihai Bâce<sup>1</sup>, Andreas Bulling<sup>1</sup>

University of Stuttgart {florian.strohm, ekta.sood, mihai.bace, andreas.bulling}@vis.uni-stuttgart.de

LMU Munich info@sven-mayer.com

German Research Center for Artificial Intelligence (DFKI) philipp.mueller@dfki.de

## 1. FaceMaker Sliders

**Table 1** lists all used FaceMaker sliders. Each slider in FaceMaker allows us to continuously manipulate one specific facial feature. As such, FaceMaker generates human-like faces and at the same time provides fine control over important features like the eyes. For a description of how the sliders manipulate the face in general, as well as the influence of each specific slider, please refer to Schwind et al. [1]. In our work we focused on the four most important features for identification (eyes, nose, mouth and jaw). We defined these features by grouping the FaceMaker sliders as defined in their paper. The subscripts in **Table 1** indicate which groups each feature is assigned to: *e* for eyes, *n* for nose, *m* for mouth and *j* for jaw.

| List of FaceMaker slider we used |                            |                             |
|----------------------------------|----------------------------|-----------------------------|
| Eyes Colour <sub>e</sub>         | Eyes Height <sub>e</sub>   | Eyes Size <sub>e</sub>      |
| Eyes Opening <sub>e</sub>        | Eyes Rotation <sub>e</sub> | Eyes Shape <sub>e</sub>     |
| Eyes Distance <sub>e</sub>       | Eyebrows Line <sub>e</sub> | Eyebrows Shape <sub>e</sub> |
| Eyebrows Colour <sub>e</sub>     | Lips Volume <sub>m</sub>   | Lip Size Ratio <sub>m</sub> |
| Mouth Shape <sub>m</sub>         | Mouth Width <sub>m</sub>   | Mouth Height <sub>m</sub>   |
| Nose Length <sub>n</sub>         | Nose Shape <sub>n</sub>    | Nose Width <sub>n</sub>     |
| Nose bridge <sub>n</sub>         | Cheeks <sub>j</sub>        | Jaw Shape <sub>j</sub>      |
| Chin Length <sub>j</sub>         | Chin Shape <sub>j</sub>    | Ears Size                   |
| Throat Size                      | Gender                     | Details                     |
| Skin Colour                      | Forehead                   | Hair Colour                 |

Table 1. The names of all used facial features in FaceMaker that can be controlled using sliders. The subscripts *e*, *n*, *m*, *j* indicate which groups each feature is assigned to (eyes, nose, mouth and jaw).

## 2. Activation Maps

The scoring network compares the human attention to neural attention and predicts how relevant the corresponding image feature is for the mental image. For a better intuition on what an activation maps is, **Figure 1** shows exam-

ples for four image features overlaid over the corresponding image. As can be seen, neural attention is highest for areas influenced the most by the corresponding slider, e.g., there is high attention on the eyes for the *Eyes Size* slider.

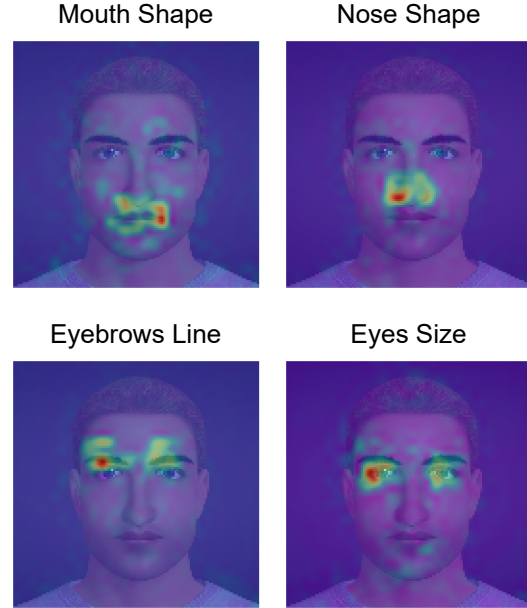

Figure 1. Example activation maps for four image features overlaid over the corresponding image.

## 3. Test Set Reconstructions

The dataset of joint image and gaze data we collected was split into a train, validation, and test set. The test set contains 36 images for all of which the following figures show the target faces, reconstructions synthesised by our method, baseline reconstructions as well as a colour-coded indication of the reconstruction quality of the different facial regions. The colour-coding was calculated by assigning each feature group to one of three equidistant bins according to their mean absolute slider distance (MASD).

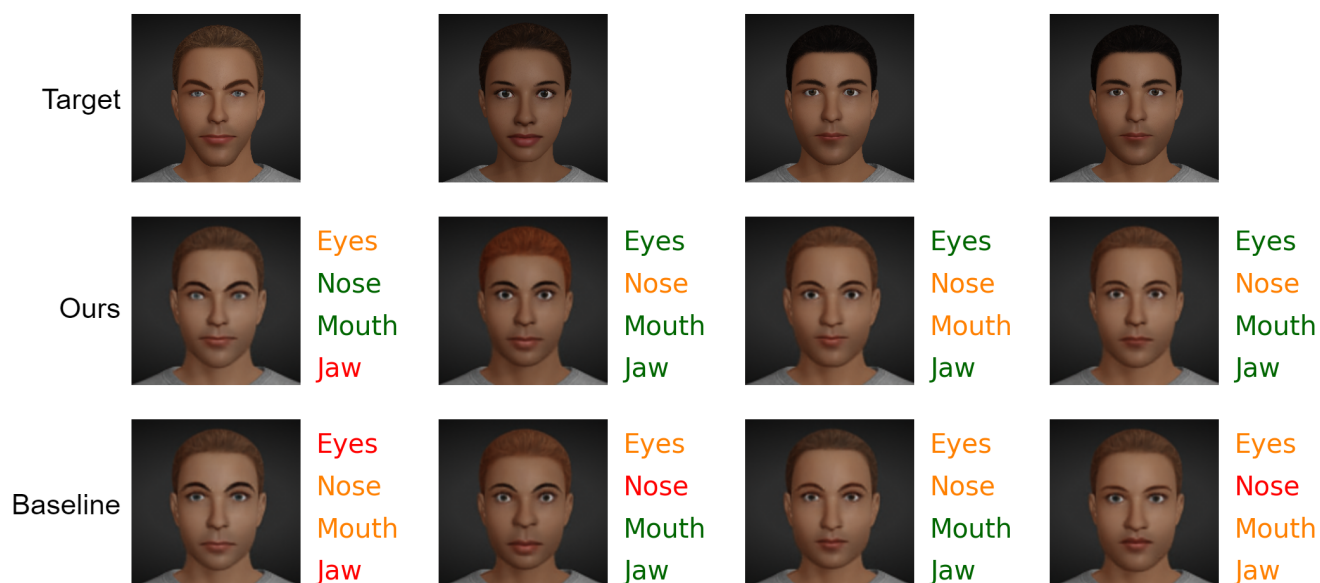

Figure 2. Test images reconstructed by our method (Ours) in comparison with the respective target and baseline. The colour-coded labels for the different facial regions indicate reconstruction quality (high, medium, or low). We calculated these by assigning each feature group to one of three equidistant bins according to their mean absolute slider distance (MASD). Columns A and B show two of the best, while C and D show two of our worst mental image reconstructions.

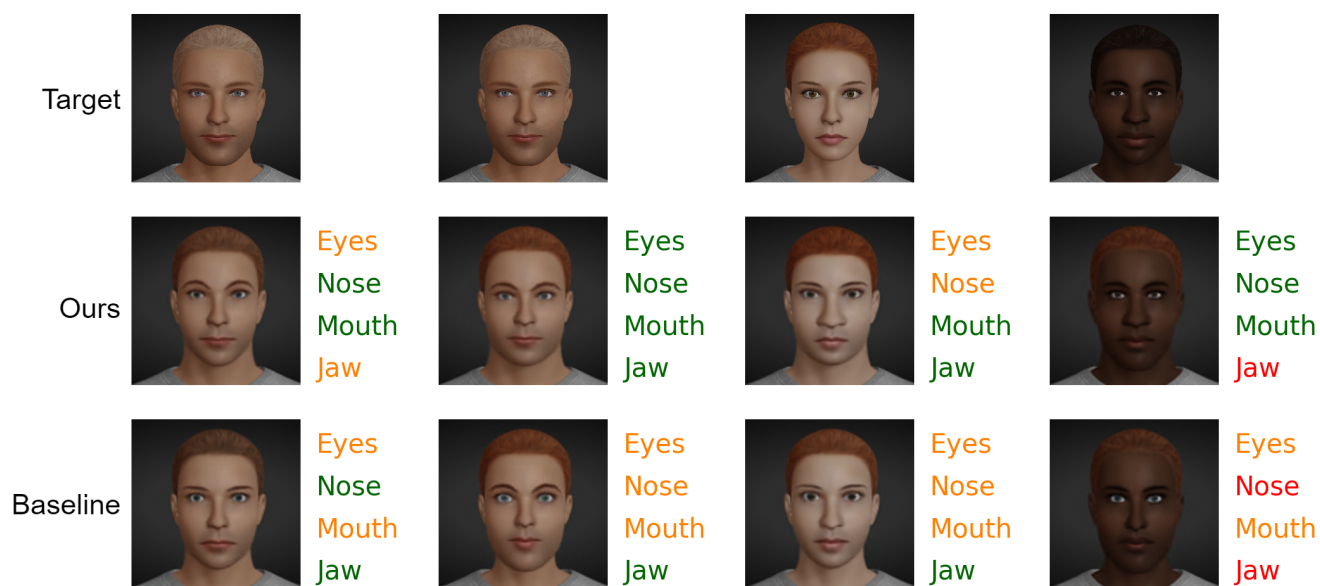

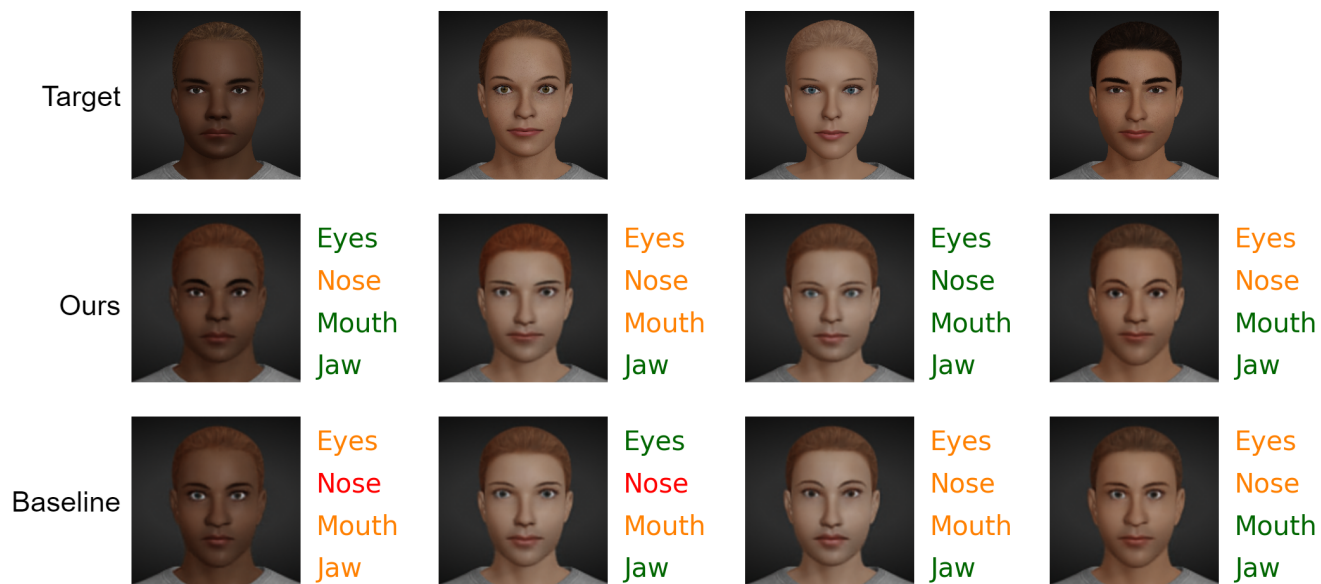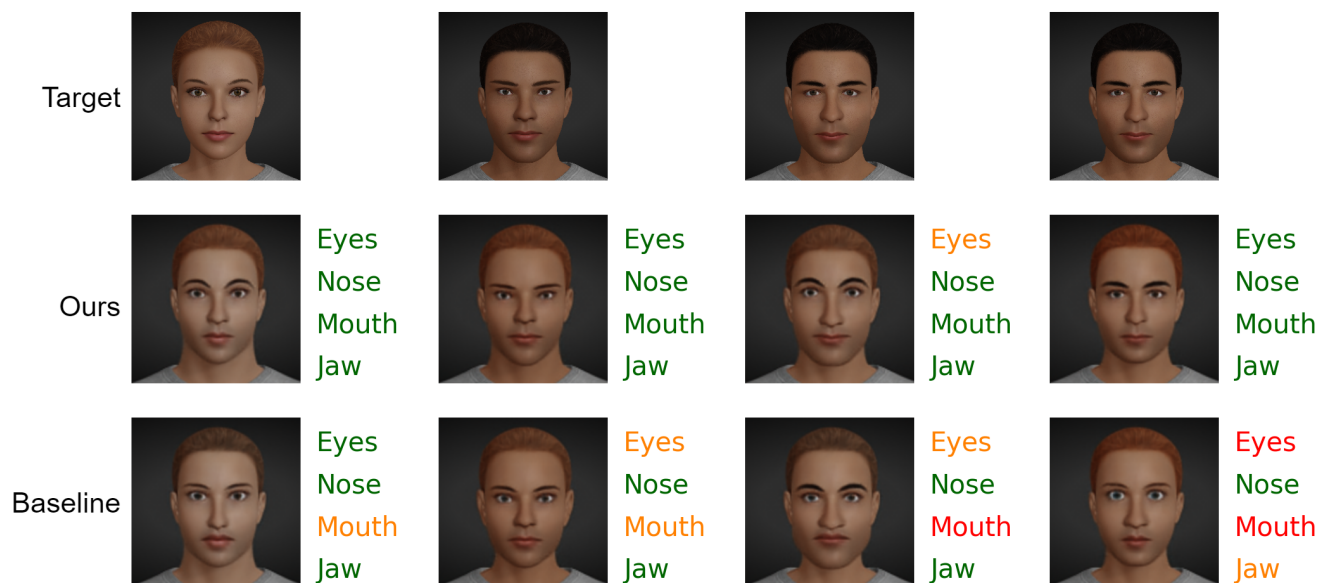

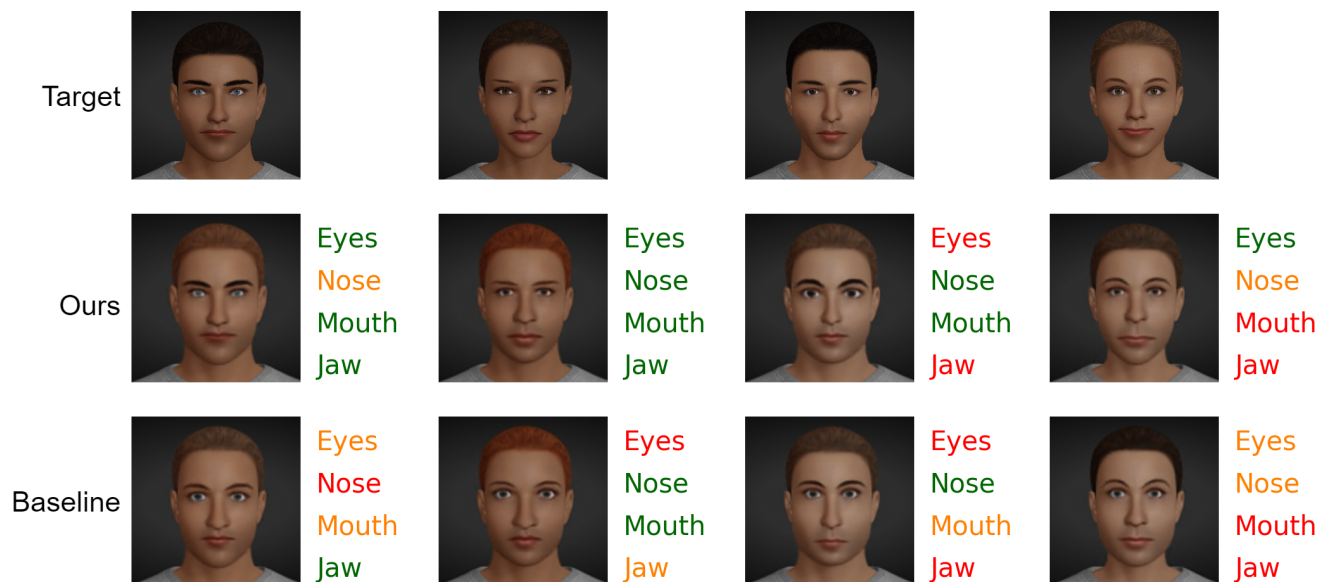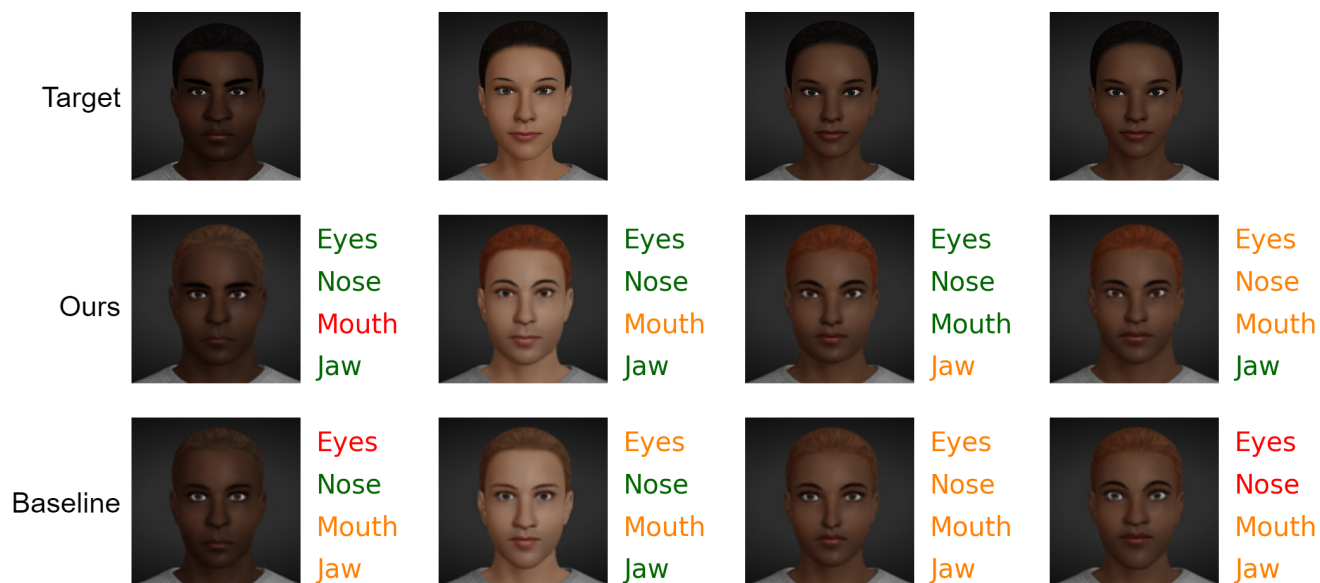



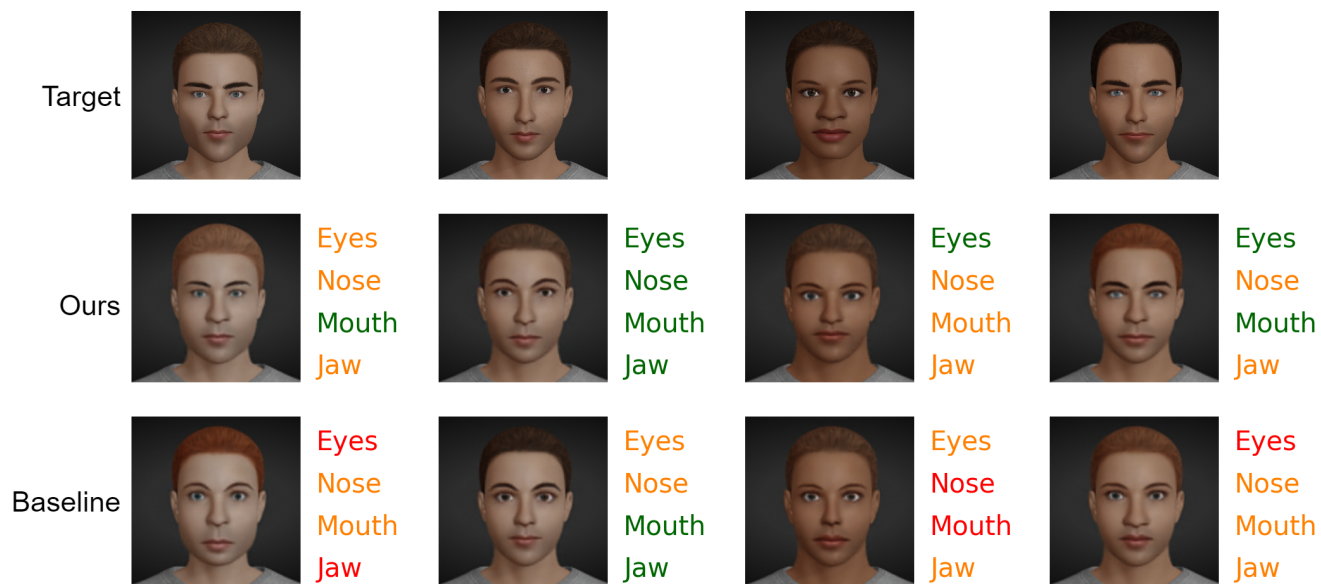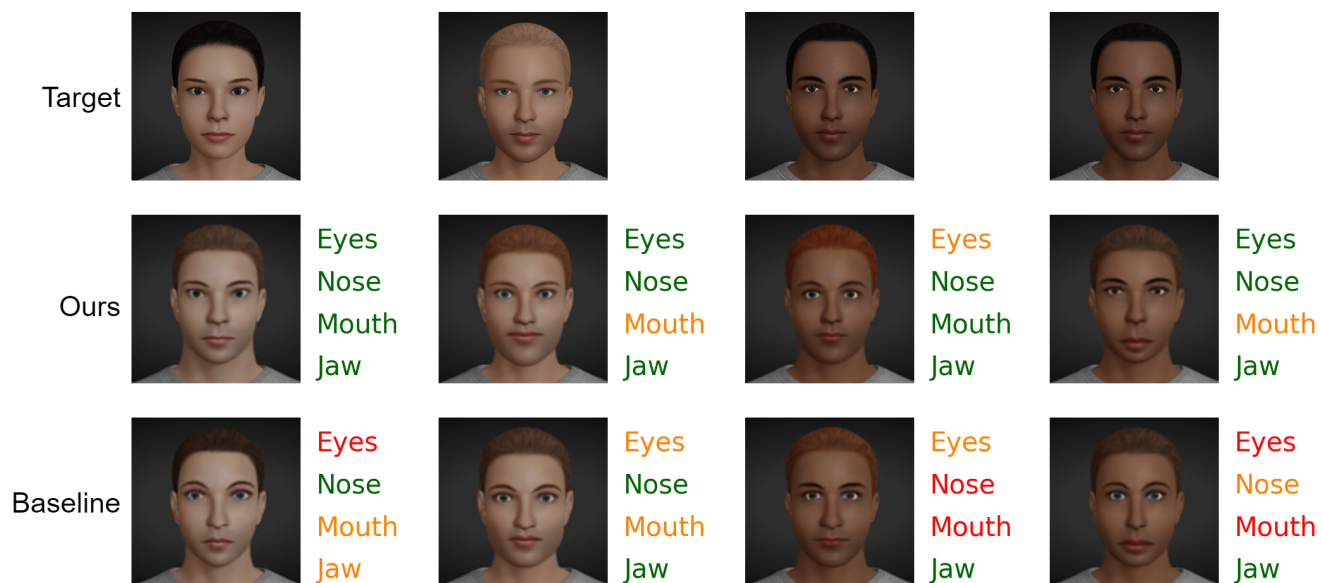

Target

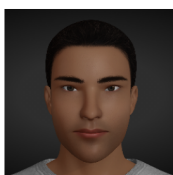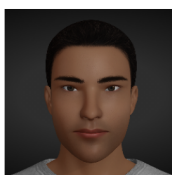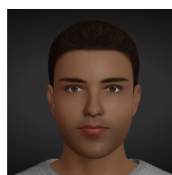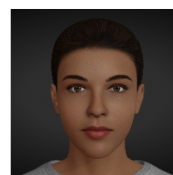

Ours

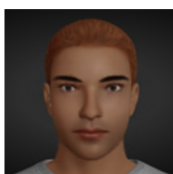

Eyes  
Nose  
Mouth  
Jaw

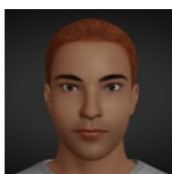

Eyes  
Nose  
Mouth  
Jaw

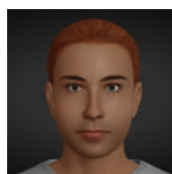

Eyes  
Nose  
Mouth  
Jaw

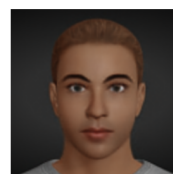

Eyes  
Nose  
Mouth  
Jaw

Baseline

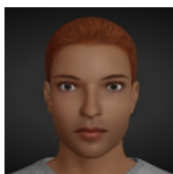

Eyes  
Nose  
Mouth  
Jaw

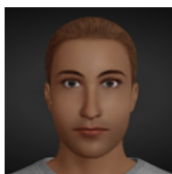

Eyes  
Nose  
Mouth  
Jaw

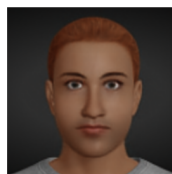

Eyes  
Nose  
Mouth  
Jaw

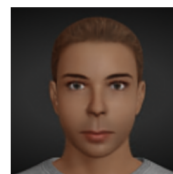

Eyes  
Nose  
Mouth  
Jaw

## References

- [1] Valentin Schwind, Katrin Wolf, and Niels Henze. *FaceMaker - A Procedural Face Generator to Foster Character Design Research*, volume Game Dynamics: Best Practices in Procedural and Dynamic Game Content Generation, pages 95–113. Springer International Publishing, Cham, 2017. [1](#)
