# Supplementary material
Source: ML conference proceedings conference paper supplement (https://openaccess.thecvf.com/content/ICCV2021/html/Strohm_Neural_Photofit_Gaze-Based_ICCV_2021_paper.html)
Supplement: Supplementary file 2 [file Strohm_Neural_Photofit_Gaze-Based_ICCV_2021_supplemental.zip]

Archive with 2 entries (2 files):
- 9418_facemaker_demo.mp4
- 09418-supp.pdf
